1 **Characterization of amylase and protease activities in the**  
2 **digestive system of *Concholepas concholepas* (Gastropoda,**  
3 **muricidae).**

4  
5 **Alejandro P. Gutierrez\***, **Viviana Cerda-Llanos**, **Diego Forttes**, **Nelson Carvajal** &  
6 **Elena A. Uribe**

7  
8 *Department of Biochemistry and Molecular Biology. Faculty of Biological Sciences.*  
9 *University of Concepcion, Chile*

10

11 *\*Corresponding author:* Alejandro P. Gutierrez, The Roslin Institute and Royal (Dick)  
12 School of Veterinary Studies, University of Edinburgh, Midlothian EH25 9RG, UK  
13 e-mail: [alejandrogutierrez@roslin.ed.ac.uk](mailto:alejandrogutierrez@roslin.ed.ac.uk)

14

15

16

17

18

19

20

21

22

23

24 **ABSTRACT**

25 *Concholepas concholepas* (loco) is a carnivorous gastropod that inhabits the coast of Chile  
26 and Peru. Its fisheries showed a great importance in the past decades, however, now mainly  
27 relies on artisanal management of wild stocks. Feeding is one of the important factors that  
28 have restrained the establishment of large scale field rearing of loco. *C. concholepas* food  
29 preferences consist of mytilids and cirripeds, however its digestive physiology has not been  
30 studied and its digestive enzymes have not been yet characterized. The purification of  
31 amylase and protease from the digestive gland and the gland of Leiblein of *C. concholepas*  
32 were performed by ionic exchange chromatography (DEAE-cellulose), and substrate-  
33 PAGE indicated the presence of the amylase and protease in the fractions collected from  
34 the column. Amylase enzymatic assays showed its maximum activity at pH 7.0 and 50°C in  
35 the digestive gland. Protease on the other hand showed a great acidic activity, specifically  
36 at pH 3.0 in both organs, also at 50°C. Inhibition of the amylolytic activity was observed in  
37 the presence of EDTA, and metal ions like MnCl<sub>2</sub>, MgCl<sub>2</sub>, ZnSO<sub>4</sub>, while it was enhanced in  
38 the presence of CaCl<sub>2</sub>, NaCl, KCl. Protease inhibition assays were also performed  
39 evidencing mainly the presence of aspartic proteases and a low but not inexistent presence  
40 of serine proteases. Our results provide evidence of important proteolytic but also  
41 amylolytic activities present in the digestive system of loco, providing evidence that this  
42 mollusc has wider digestive capabilities than initially though, which could potentially lead  
43 to the development of alternative food diets.

44

45 **Keywords:** amylase, protease, *Concholepas concholepas*, enzymatic activity, feeding  
46 behavior.

47

## 48 INTRODUCTION

49 *Concholepas concholepas*, commonly known as loco, is a carnivorous muricid gastropod  
50 that inhabits the entire coast of Chile and southern Peru. It was once one of the most  
51 important benthic shellfish mollusc extracted in Chile (Castilla and Defeo 2001) but the  
52 increasing demand and consequently extraction lead to its overexploitation in the late 80's  
53 (Castilla and Defeo 2001; Leiva and Castilla 2001). Currently its harvest is basically  
54 sustained by both artisanal fisheries and the establishment of "Management and  
55 Exploitation Areas" (MEAs) which account for approximately 4000 tons per year  
56 (SERNAPESCA 2014) and international markets mainly influenced by Asia have  
57 maintained the demand for this resource.

58

59 The digestive system of loco is similar to that of other gastropods with a well-  
60 defined esophagus, intestine and stomach (Huaquín 1966; Maldonado 1965); however, to  
61 our knowledge, little information is available with respect to the digestive physiology of  
62 this species, although it is known that it is a carnivorous gastropod which food preferences  
63 and requirements include Cirripeds, Ascidians and some Mytilids ( Stotz et al. 2003, Dye  
64 1991; Méndez and Cancino 1990). To date, breeding of loco has not been achieved  
65 successfully due to several factors; among those, feeding has been identified as one of the  
66 important issues hindering the establishment of sustainable field rearing (Manríquez et al.  
67 2008).

68

69 Nutrition is a costly but important component of the farming process of all species.  
70 Due to the predation nature of loco, the problem is substantial because of the need of a co-  
71 culture of live prey stocks. The formulation of an efficient feeding diet is desirable in most

72 important aquaculture species, therefore, the understanding of their digestive physiology is  
73 an essential step in this process (Zambonino Infante and Cahu 2007). Digestive enzymes  
74 play an essential role in food degradation and are determinants of the digestibility and  
75 assimilation efficiency (Fernández et al. 2001; Picos-Garcia et al. 2000). In fact the ability  
76 of an animal to digest and absorb nutrients depends on the presence and the quality of their  
77 digestive enzymes (Kumar et al. 2007; Alarcón et al. 1998). In fish the activity of digestive  
78 enzymes are thought to indicate the feeding ecology and diet, which in some cases  
79 correlates with a plasticity in their production (German et al. 2004; Fernández et al. 2001).  
80 In fact they have been a mayor object of study in marine animals because of their  
81 biochemicals properties and variables applications (Fu et al. 2005; Chakrabarti et al. 1995;  
82 Dimes et al. 1994).

83

84 Amylase catalyzes the endohydrolysis of 1,4- $\alpha$ -D-glucosidic linkages of polysaccharides  
85 and are widely distributed in animals. Amylases are known to be more active in herbivores  
86 than in carnivores, due to a diet composed almost exclusively of carbohydrates (German et  
87 al. 2010). In molluscs amylase has been described in herbivorous species such as *Mytilus*  
88 *galloprovincialis* (Lombraña et al. 2005), *Hyriopsis bialatus* (Areekijserree et al. 2004),  
89 *Perna viridis* (Sabapathy and Teo 1992) and several *Haliotis* species (Nikapitiya et al.  
90 2009; Hsieh et al. 2008; Viana et al. 2007; Garcia-Carreno et al. 2003; Tsao et al. 2003;  
91 Picos-Garcia et al. 2000). Further, it has also been described in carnivorous fishes of great  
92 aquaculture importance like salmonids, but showing lower levels of amylase activity  
93 compared to proteolytic activity (Hidalgo et al. 1999). Digestive proteases such as trypsin,  
94 chymotrypsin carboxypeptidases and aminopeptidases, are mainly produced in the digestive  
95 gland, but also in the gland of Leiblen which is highly developed in muricids gastropods

96 (Andrews and Thorogood 2005; Mansour-Bek 1934). In fact, the Gland of Leiblein has  
97 been described as a secretor of proteolytic enzymes and a useful defense barrier (Ponce et  
98 al. 1990) in *C. concholepas*. Proteolytic enzymes play a fundamental role in food digestion  
99 and storage of chemical energy (Sainz et al. 2004), considering that they are in charge of  
100 the degradation of proteins obtained from the diet. Moreover, since protein utilization is  
101 fundamental for growth, proteases have an important role to play in fish development  
102 (Kumar et al. 2007). Proteolytic enzymes in the digestive organs of invertebrates have been  
103 well documented and characterized, e.g. spinny lobster *Panulirus interruptus* (Celis-  
104 Guerrero et al. 2004), shrimps like *Artemesia longinaris* (Fernández Gimenez et al. 2002),  
105 *Penaeus indicus* (Omondi and Stark 2001), the mud crab *Scylla serrata* (Pavasovic et al.  
106 2004), the pacific oyster *Crassostrea gigas* (Luna-Gonzalez et al. 2004) and various species  
107 of abalone as red abalone *Haliotis rufescens* (Garcia-Esquivel and Felbeck 2006), green  
108 abalone *Haliotis fulgens* (García-Carreño et al. 2003), black abalone *Haliotis rubra*  
109 (Edwards and Condon 2001) and in juvenile South African abalone *Haliotis midae* (Knauer  
110 et al. 1996), however, studies of the digestive enzymes in carnivorous molluscs are scarce.

111

112 The aim of this study was to analyze for the first time the amylase and proteolytic  
113 activities present in the digestive system of the carnivorous gastropod *C. concholepas*. We  
114 aimed to evaluate the potential ability of the animal to assimilate and digest protein and  
115 carbohydrates regardless of its normal food preferences. These analyses could provide  
116 significant information for the understanding of their carnivorous nature and ability to  
117 digest food, but also provide insights on the possible formulation of new feeding diets.

118

119

## 120 MATERIALS AND METHODS

### 121 *Sampling of C. concholepas*

122 The *C. concholepas* individuals were collected by fishermen from a legally  
123 authorized extraction zone in the shores of Maule fishing cove, located in the eighth region  
124 of Chile (-37.009,-73.190) . The individuals were chosen with respect to size as they were  
125 collected by the fishermen.

126

### 127 *Preparation of extracts and partial purification of enzymes*

128 Individuals were dissected and their digestive system were extracted, specifically the  
129 digestive gland and the gland of Leiblein. Once isolated, tissues were washed with distilled  
130 water, weighed and then homogenized in 10 mM Tris-HCl buffer, pH 7.5 at 4°C. To  
131 eliminate feed residues, solid material and lipids, the homogenate was centrifuged at 10.500  
132 X g for 10 min, also at 4°C. The supernanant crude extract was dialyzed for at least 3 hours  
133 at 4°C in 10mM Tris-HCl, pH 7.5 buffer, then the extract was applied trough a anionic  
134 exchange chromatography of diethylaminoethyl-cellulose (DEAE-cellulose) calibrated with  
135 Tris-HCl 10 mM, pH 7.5. 50 ml of the crude extract was applied into the column several  
136 times in order to allow the proteins electrostatically interact with the resin. The column was  
137 washed with 10 mM Tris HCl buffer, pH 7.5 and then eluted in two steps: first with 250  
138 mM KCl buffer in 10 mM Tris-HCl, pH 7.5, followed by 500 mM KCl buffer in 10 mm  
139 Tris-HCl, pH 7.5. Fractions of approximately 1 ml were collected, and then used for further  
140 analysis.

141

### 142 *Amylase Enzyme assays*

143 Amylase activity was determined according to Bernfeld (1955). Briefly, 50  $\mu$ l of the  
144 enzyme was mixed with 50  $\mu$ l of 100 mM Tris-HCl buffer pH 7.0 and 100  $\mu$ l of 1% starch  
145 at pH 7.0. The mixture was incubated at 40°C for 30 minutes, followed by the addition of  
146 200  $\mu$ l dinitrosalicylic acid (DNS) to stop the reaction. After mixing by swirling, the  
147 mixture was heated for 5 minutes at 100°C to allow the DNS reaction. Afterwards, 2 ml of  
148 distilled water were added, and the absorbance was measured at 540 nm. One unit of  
149 activity was defined as the amount of maltose released in 1 minute of enzymatic reaction.

150

151 For the determination of optimum pH of amylase, the assay was conducted using the  
152 following buffers with variable pH values: 0.1M KCl pH 2.0; 0.1M citrate pH 3.0, 4.0 and  
153 5.0; 0.1M phosphate pH 6.0, 7.0 and 8.0; 0.1M Gly-NaOH pH 9.0, 10.0 and 11.0. The  
154 determination of amylase activity was carried out as described earlier, plus the addition of  
155 300 $\mu$ l of the selected buffer to the reaction mixture. The temperature effect on amylase  
156 activity was determined by assaying enzyme activities at temperatures of incubation  
157 ranging from 10 to 70°C, at optimum pH.

158 To determine the effect of metal ions in amylase activity, the protein extract was  
159 first dialyzed in 5 mM Tris-HCl, pH 7.5 for 2 hours and then the amylase activity was  
160 measured with: 10 mM of CaCl<sub>2</sub>, NaCl, KCl, ZnSO<sub>4</sub>, MnCl<sub>2</sub>, MgCl<sub>2</sub>, and the chelating  
161 agent ethylenediaminetetraacetic acid (EDTA) .The assay was carried out at 40°C, pH 7.0.

162

### 163 ***Proteolytic Enzymes assays***

164 Proteolytic activity was determined by the digestion of casein according to (Glass  
165 et al. 1989), with modifications. The assay was conducted using the following buffers with  
166 variable pH values: 0.1M KCl (pH 2.0), 0.1M citrate (pH 3.0 - 5.0), 0.1M phosphate (pH

167 6.0 - 8.0), 0.1M Gly-NaOH (pH 9.0 - 11.0). Briefly, 50  $\mu$ l of the enzyme was mixed with  
168 200  $\mu$ l of the buffer according to pH and 50  $\mu$ l of 2% casein at pH 7.0. The mixture was  
169 incubated for 30 minutes at 37°C. The reaction was stopped by adding 250 $\mu$ l of 10 % (w/v)  
170 trichloroacetic acid (TCA) and left at 4°C for 30 min. The samples were then centrifuged at  
171 10.000 rpm for 5 minutes and 350  $\mu$ l of the supernatant was mixed with 900  $\mu$ l of 0.5 M  
172 sodium carbonate (Na<sub>2</sub>CO<sub>3</sub>) followed by the addition of the Folin-Phenol reagent. The  
173 absorbance of the reaction mixture was recorded at 660 nm to quantify the amount of  
174 tyrosine produced measured in units (U). One U is defined as the amount of tyrosine  
175 released in 30 minutes of enzymatic reaction. The specific activity of both enzymes is  
176 defined as units per minute per mg protein (U min<sup>-1</sup> mg prot.<sup>-1</sup> ).

177

178 In order to determine the presence of major classes of proteolytic enzymes, the  
179 effect of inhibitors on the proteolytic activity was tested according to García-Carreño  
180 (1992). Enzyme extracts were incubated with different specific proteinase inhibitors.  
181 Phenylmethylsulfonyl fluoride (PMSF, 100 mM in ethanol) were used as inhibitors of  
182 proteinases belonging to the serine class. Ethylenediaminetetraacetic acid (EDTA, 500mM  
183 in distilled water) was used as an inactivator of metallo-proteinases. For inhibition of  
184 aspartic proteases, 5 $\mu$ g/ml of Pepstatin A (50  $\mu$ g /ml in DMSO or methanol) were used.  
185 Proteolytic activity was measured as described above.

186

### 187 ***Electrophoresis***

188 The fractions collected from DEAE-column with amylase and protease activity were  
189 analyzed in 12% SDS-PAGE according to Laemmli (1970). The samples were mixed with  
190 a solution of electrophoresis buffer which contained 1M Tris HCl buffer, 10% SDS, 10%



191 glycerol, 0.5% bromophenol blue and 10%  $\beta$ -mercaptoethanol in a 1:5 proportion. After  
192 boiling the samples for 5 minutes, the electrophoresis was carried out at 80 V for at least  
193 two hours. The gels were stained in 0.1% Coomassie brilliant blue R-250.

194 Substrate-SDS-PAGE for detected amylase activity was performed on 4% stacking  
195 gel and a 12% resolving gel in presence of 2% starch for detection of amylase activity.  
196 Electrophoresis was carried out at 60 V until the samples passed through the stacking gel,  
197 and then raised to 90V for at least three hours. The samples and the electrophoresis buffer  
198 were mixed in a 1:1 v/v proportion, in absence of reducing agents. The amylase activity  
199 was detected by staining the gels with iodine after incubation in 100 mM Tris-HCl pH 7.5  
200 for 2 h at 40°C.

201 Protease Substrate-PAGE was performed on 4% stacking gel and an 8% resolving  
202 gel copolymerized with 2% casein for detection of proteolytic activity. Electrophoresis was  
203 carried out at 70 V until the samples pass through the stacking gel, and then raised up to  
204 100V for at least three hours. The samples and the electrophoresis buffer were mixed in a  
205 1:1 v/v proportion, in absence of reducing agents and SDS and without boiling. The  
206 proteolytic activity was detected by staining the gels with 0.1% Coomassie brilliant blue  
207 G-250 after incubation in 50mM Tris HCl pH 7.0 and 0.1M Citrate buffer pH 3.0 at 37°C  
208 overnight.

209  
210 ***Protein content***

211  
212 Protein content was determined by the method of Bradford (Bradford 1976) using  
213 bovine serum albumin as standard.

214

215

216 **RESULTS**

217 ***Enzyme purification***

218 The amylase and protease enzymes were purified through of a DEAE-cellulose  
219 column calibrated to pH 7.5. The enzymes were retained in the column and then eluted with  
220 250 mM and 500 mM KCl in 10 mM Tris-HCl, pH7.5. The profile of total proteins and  
221 amylase activity are shown in Table 1.

222  
223 **Table 1.** Summary of the purification procedures and enzymatic activity of amylase from  
224 *C. concholepas*  
225

| Procedure                    | Protein | Total activity (mU)* | Specific activity (mU/mg) | Recovery (%) | Purification factor |
|------------------------------|---------|----------------------|---------------------------|--------------|---------------------|
| Crude extract                | 0.13    | 43.83 ± 2.74         | 6.74 ± 0.37               | 100          | 1                   |
| <i>DEAE-cellulose pH 7.5</i> |         |                      |                           |              |                     |
| 10mM Tris-HCl peak           | 0.01    | 28.56 ± 1.17         | 57.12 ± 2.34              | 65.16        | 8.47                |
| 250mM Tris-HCl peak          | 0.004   | 21.48 ± 1.11         | 107.41 ± 5.54             | 49.01        | 15.93               |
| 500mM Tris-HCl peak          | 0.002   | 5.36 ± 0.32          | 53.59 ± 3.1               | 12.23        | 7.95                |

226 \* mU:  $\mu\text{mol maltose min}^{-1}$ . The tissue homogenate was applied to several elutions of protein purification  
227 procedure by ionic exchange chromatography. Total activity is expressed in miliUnits (mU) and specific  
228 activity is expressed in miliUnits per mg of protein<sup>-1</sup> (mU/mg).  
229  
230

231 The amylase activity was also expressed in specific activity (mU/mg) that increased  
232 according to its purification. The crude extract from the digestive gland showed a specific  
233 activity of 6.74±0.37 mU/mg. After the extract was applied to the DEAE-cellulose column  
234 purification, the specific activity of amylase increased up to 57.12±2.34 mU/mg in the  
235 10mM Tris HCl buffer wash. The following elutions with 250 and 500mM KCl buffer,  
236 showed a specific activity of 107.41±5.54 mU/mg and 53.59±3.1 mU/mg respectively. The  
237 gland of Leiblein did not show any amylase activity.

238

239 On the other hand, the digestive gland showed slightly higher proteolytic specific  
 240 activity ( $7.90 \pm 0.31$  U/mg prot<sup>-1</sup>) than the gland of Leiblein ( $6.81 \pm 0.37$  U/mg prot<sup>-1</sup>) in the  
 241 crude extract (Table 2), however, it was much higher in the last step of the purification  
 242 procedure showing an increment of approximately 60% in relation to the 13% of difference  
 243 between them in the crude extract.

244 **Table 2.** Total and specific protease activity in the gland of Leiblein and the  
 245 digestive gland of *C. concholepas*.

| Procedure                    | Digestive Gland      |                           | Gland of Leiblein    |                           |
|------------------------------|----------------------|---------------------------|----------------------|---------------------------|
|                              | Total activity (mU)* | Specific activity (mU/mg) | Total activity (mU)* | Specific activity (mU/mg) |
| Crude extract                | $67.11 \pm 2.63$     | $7.90 \pm 0.31$           | $44.27 \pm 2.42$     | $6.81 \pm 0.37$           |
| <i>DEAE-cellulose pH 7.5</i> |                      |                           |                      |                           |
| 10mM Tris-HCl peak           | $49.37 \pm 3.07$     | $32.92 \pm 2.04$          | $34.45 \pm 1.93$     | $28.71 \pm 1.72$          |
| 250mM Tris-HCl peak          | $35.30 \pm 2.12$     | $117.66 \pm 7.06$         | $19.36 \pm 1.12$     | $75.94 \pm 4.39$          |
| 500mM Tris-HCl peak          | $30.57 \pm 1.94$     | $203.81 \pm 12.9$         | $17.29 \pm 1.56$     | $123.52 \pm 11.14$        |

247 \* mU:  $\mu\text{mol tyrosine min}^{-1}$ . The tissue homogenate was applied to several elutions of protein purification  
 248 procedure by ionic exchange chromatography. Total activity is expressed in miliUnits (mU) and specific  
 249 activity is expressed in miliUnits per mg of protein<sup>-1</sup> (mU/mg).

251 Specific activity was low in the crude extract, however it consistently increasing  
 252 from  $7.90 \pm 0.31$  U/mg prot<sup>-1</sup> to  $203.81 \pm 12.9$  U/mg prot<sup>-1</sup> in the digestive gland and from  
 253  $6.81 \pm 0.37$  U/mg prot<sup>-1</sup> to  $123.52 \pm 11.14$  U/mg prot<sup>-1</sup> in the gland of Leiblein during the  
 254 purification procedure.

255

### 256 ***Sustrate SDS-PAGE***

257 Substrate SDS-PAGE results (Figure 1a), shows the presence of amylase activity on  
 258 two bands in selected fractions from the 250mM KCl buffer elution, detected by means of  
 259 degradation of starch contained in the gel. This could represent the presence of two possible  
 260 isoforms of purified amylase. These results are in concordance with SDS-PAGE analysis

261 (Figure 1b), where the same fractions shows the presence of two bands, similar as the ones  
262 seen in Figure 1a.  
263

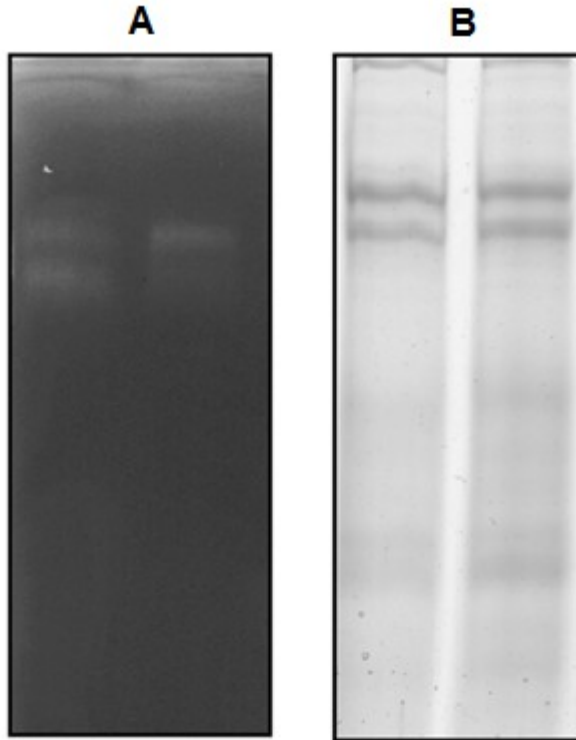

264

265 **Figure 1.** Electrophoretic analysis of two purified fractions of 250mM KCl buffer elution  
266 from DEAE column. **A.** Substrate SDS-PAGE. The presence of two bands in every fraction  
267 shows amylase activity and two possible isoforms of the enzyme. **A.** SDS-PAGE. The  
268 presence of two main bands in the same fractions corroborate the presence of amylase and  
269 the two isoforms like shown in A).  
270

271 In the case of proteases, substrate PAGE revealed the presence of white bands in a  
272 dark background which indicate the existence of proteolytic activity in fractions from the  
273 DEAE column in the gland of Leiblein and the digestive gland (Figure 2). This technique  
274 showed clear bands when the gels were incubated at pH 3.0 which is in agreement with the  
275 results obtained earlier, where the highest proteolytic activity was found at this pH. In

276 contrast, at pH 7.0 the bands were almost null but not inexistent. Proteolytic activity was  
277 found at this pH, but in a much lower level than the acidic pH.  
278

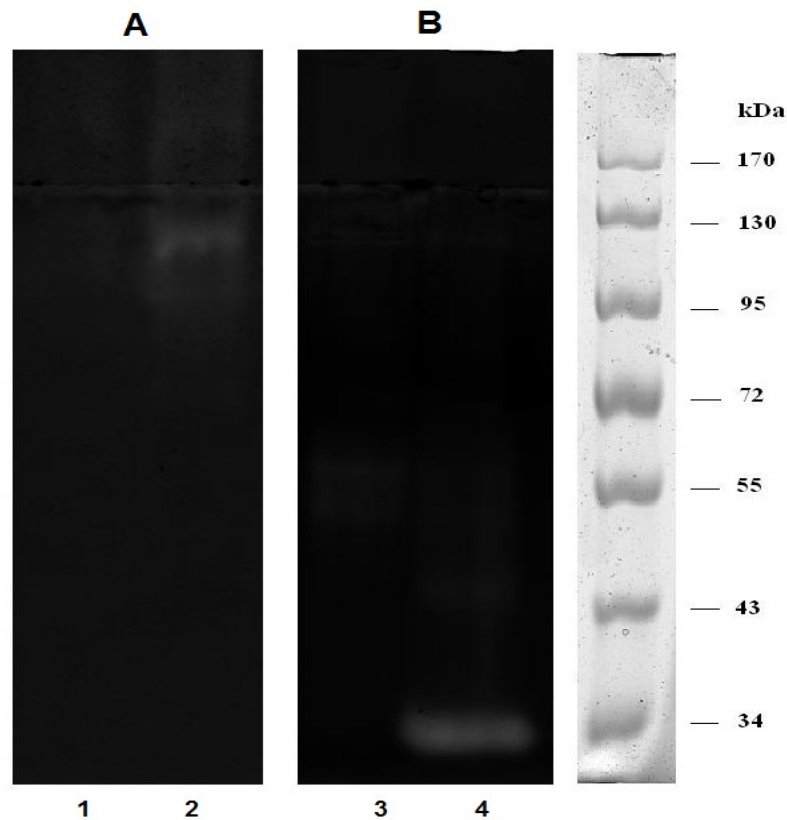

279

280 **Figure 2.** Substrate-PAGE shows proteolytic activities in fractions from the 250mM KCl  
281 elution of the DEAE column at a) pH 7.0 and b) pH 3.0. Lane 1, 3: Digestive gland. Lane  
282 2, 4: Gland of Leiblein of *C.concholepas*.  
283

#### 284 *Effect of temperature and pH*

285 The effect of pH on the amylase activity was examined at 40°C using different types  
286 of buffers for each pH. Analyses showed that the optimum pH for amylase activity was pH  
287 7.0 in the digestive gland (Figure 3). On the other hand, the amylase activity at acidic and  
288 alkaline pH was weak but comparable between each other, except for pH 11-12 where the

289 activity dropped drastically, although acidic forms of amylase seem to be more active than  
290 alkaline forms.

291

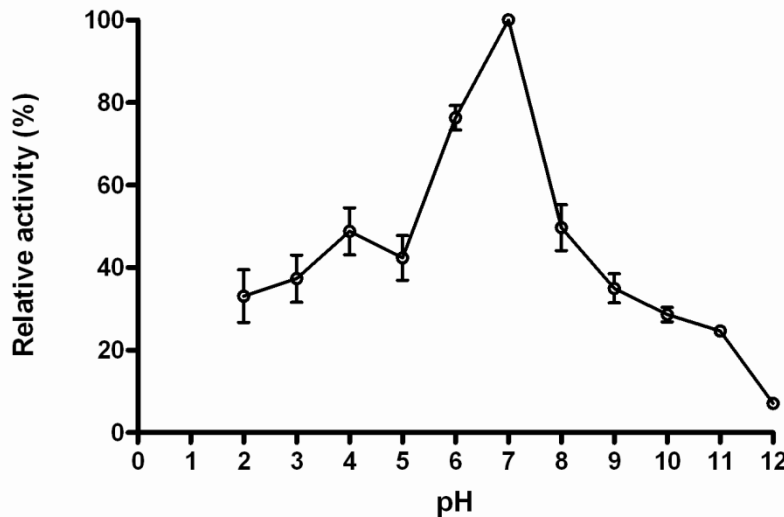

292

293 **Figure 3.** Effect of pH on amylase activity of *C. concholepas*. Maximum activity was  
294 detected at pH 7.0 at 40°C for 30 minutes. The assay was repeated 3 times. Error bars  
295 represent standard error ( $\pm$ SE).

296

297 The highest proteolytic activity in the digestive gland of *C. concholepas* was found  
298 at pH 3.0, suggesting that this gland possess a high level of acidic proteolytic enzymes.

299 (Figure 4). At pH 4.0, the activity dropped considerably and was maintained throughout the

300 neutral pH to then slightly rise again in presence of an alkaline medium, although it is not

301 comparable with the high levels of activity at acidic pH. In addition, the gland of *Leiblein*

302 had an optimum pH of protease activity very similar to the digestive gland showing high

303 activities at pH 3.0, however at neutral pH (6.0 and 7.0) the activity was slightly higher

304 than in the digestive gland. At an alkaline pH, the proteolytic activity was low.

305

306

307

308

309

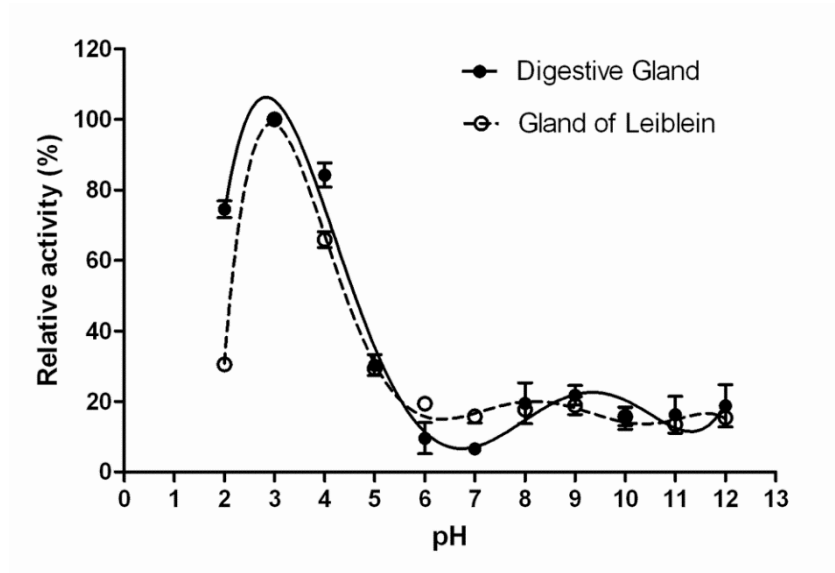

310

311 **Figure 4.** Effect of pH on the proteolytic activity in the digestive gland and the Leiblein  
312 gland of *C. concholepas* assayed at 37°C for 30 minutes. Maximum proteolytic activity was  
313 found at pH 3.0 in both organs. Error bars represent standard error ( $\pm$ SE).

314

315 Amylase activity was measured at different temperatures at pH 7.0. The maximum  
316 activity was found at a temperature of 50°C as shown in Figure 5. The activity was retained  
317 up to more than 50% of the maximum between 30–60 °C, and then it began to decrease  
318 maintaining only 20% of the maximum activity at extreme temperatures.

319

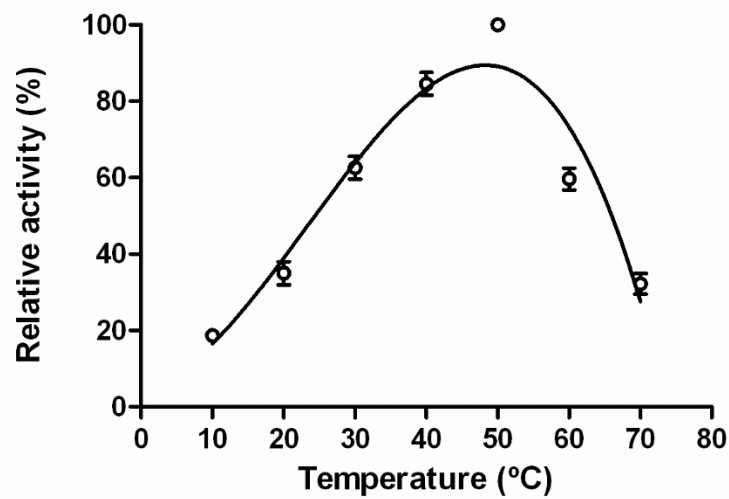

320

321 **Figure 5.** Effect of temperature in amylase activity of *C. concholepas* at pH 7.0. Maximum  
322 activity was detected at 50°C in a 30 min. reaction. The assay was repeated 3 times. Error  
323 bars represent standard error ( $\pm$ SE).

324

325

The effect of temperature on proteolytic activity was also analyzed (Figure 6). The

326

highest activity was detected at 50°C pH 3.0 in both digestive gland and gland of Leiblein,

327

however, at 70°C the enzymes did not inactivate, showing a 9.28% and 20.03% more

328

proteolytic activity than the values detected at 10°C in the gland of Leiblein and the

329

digestive gland respectively.

330

331



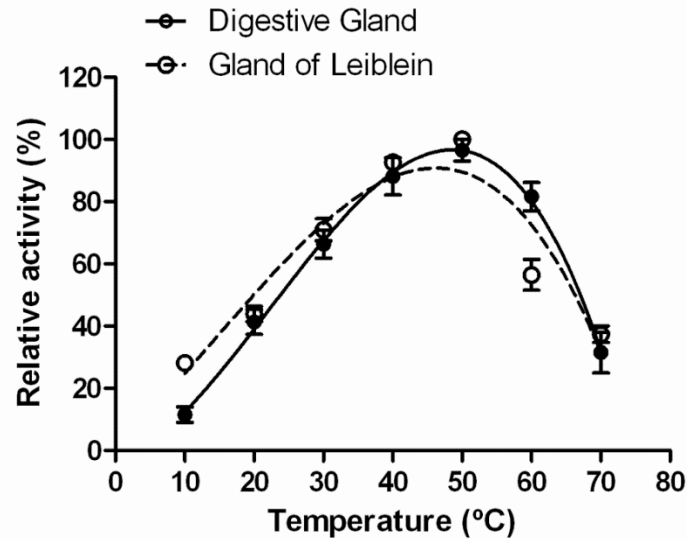

332

333 **Figure 6.** Effect of temperature on proteolytic activity in the digestive gland and in the  
334 gland of Leiblein of *C. concholepas* assayed at 37°C for 40 minutes at pH 3.0. Maximum  
335 proteolytic activity was found at 50°C in both organs. Error bars represent standard error  
336 ( $\pm$ SE).

337

### 338 *Effect of metal ions and inhibitors on amylase and proteolytic activity*

339 Figure 7 shows the effect of metal ions (10mM) on the activity of amylase. The  
340 results obtained in the analyses performed in the digestive gland showed an increase on the  
341 amylase activity when the enzyme interacts with NaCl, KCl and CaCl<sub>2</sub>, while in presence  
342 of EDTA, MnCl<sub>2</sub>, MgCl<sub>2</sub> and, ZnSO<sub>4</sub> the activity showed a decrease in the activity.

343

344 In presence of Na<sup>+</sup>, Ca<sup>2+</sup> and K<sup>+</sup>, the amylase activity rose over two hundred percent  
345 in relation to the control, while when the enzyme was incubated with EDTA and metals  
346 ions like Mn<sup>2+</sup>, Mg<sup>2+</sup> the activity decreased between 50 and 70% approximately. Zn<sup>2+</sup>  
347 greatly affected the amylase activity, producing a decrease in the activity of almost 100%  
348 on its presence. The control represents 100% of the total amylolytic activity in absence of  
349 metal ions.

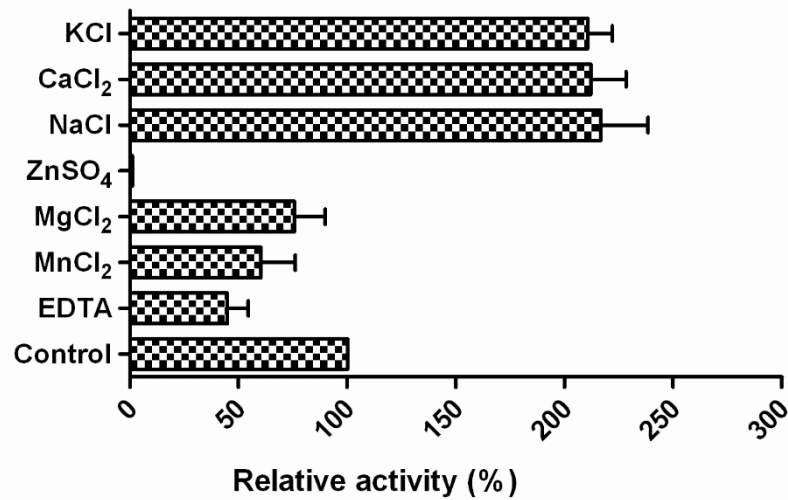

350

351 **Figure 7.** Effect of 10mM of metal ions on amylase activity of *C. concholepas*, at pH 7.0  
 352 for 40 min. Activity was enhanced in the presence of NaCl, CaCl<sub>2</sub> and KCl, and inhibited by  
 353 EDTA, MnCl<sub>2</sub>, MgCl<sub>2</sub> and ZnSO<sub>4</sub>. The error bars represent  $\pm$ SE.

354

355 Specific protease inhibitors were assessed in the digestive gland and the gland of  
 356 Leiblein of *C. concholepas*. Table 3 shows the inhibition percentage of the proteolytic  
 357 activity on these organs. Results show that Pepstatin A inhibited protease activity 100% in  
 358 the digestive gland whereas in the gland of Leiblein it showed a 90% of inhibition.

359

360 **Table 3.** Effect of specific inhibitors on protease activity in the digestive gland and the  
 361 gland of Leiblein of *C. concholepas*.

362

| Inhibitor   | Final Concentration (mM) | Inhibition (%)  |                   |
|-------------|--------------------------|-----------------|-------------------|
|             |                          | Digestive Gland | Gland of Leiblein |
| Control     | 0                        | 0               | 0                 |
| Pepstatin A | 5                        | 100             | 90.49             |
| PMSF        | 5                        | 34.4            | 58.62             |
| EDTA        | 5                        | 33              | 20.77             |

363

364

365

366           These results provide evidence of the presence of aspartic proteases in both tissues,  
367 being pepsin the most probable since Pepstatin A is specific for this enzyme. PMSF was  
368 more efficient in the gland of Leiblein inhibiting the activity more than 50%, which might  
369 indicate the presence of serine proteases. EDTA inhibited 75% of the proteolytic activity in  
370 the digestive gland, whereas in the gland of Leiblein, it only decreased it only in a 40  
371 percent. This also provides evidence of the presence of metalloproteases in the both organs;  
372 however, the digestive gland seemed to have the more of these types of proteases due to its  
373 high level of inhibition in comparison with the gland of Leiblein.

374

## 375 **DISCUSSION**

376           This study is the first to characterize both protease and amylase activities present in  
377 the digestive system of a carnivorous gastropod as *C. concholepas*. Moreover, this study  
378 provides novel evidence of the presence of amylase in its digestive system, suggesting  
379 wider digestive capabilities for the digestion of food.

380

### 381 ***Amylase activity***

382           The purification and characterization of the amylase activities in the digestive gland  
383 of *C. concholepas* was carried out by anionic exchange chromatography (DEAE-cellulose  
384 calibrate pH 7.5), which was an efficient methodology for the *C. concholepas* amylase  
385 purification. Based on its chromatographic behavior, it is possible to suggest that the  
386 isoelectric point of the amylase is over 7,5 pH, and this information is relevant for future  
387 purifications.

388           The *C. concholepas* amylase showed an increase on its specific activity during the  
389 purification procedure raising up to  $107.41 \pm 5.54$  mU/mg on the 250mM KCl Tris-HCl

390 elution, however its values are lower compared to other gastropod species that are known to  
391 be herbivorous and showed higher amylase specific activity (Lombraña et al. 2005; Tsao et  
392 al. 2003, 2004). Nevertheless, as a carnivore, lower levels of amylase activity could be  
393 expected when compared to the proteolytic activity as it has been described in fishes with  
394 different feeding behaviors, but mainly in carnivores ( Matus de la Parra et al. 2007;  
395 Fernández et al. 2001; Hidalgo et al. 1999; Chakrabarti et al. 1995; Sabapathy and Teo  
396 1993).

397         The electrophoretic analysis carried out to detect the purified amylase through  
398 substrate SDS-PAGE and SDS-PAGE revealed the presence of two bands with both  
399 techniques used. These two bands could indicate the presence of two isoforms of the  
400 enzyme in the digestive gland of *C. concholepas*. Same number of isoforms have been  
401 described for other species where this type of techniques were useful to detect the presence  
402 of the enzyme (Fernández et al. 2001). Moreover, these results are in line with other  
403 amylase isoforms previously identified in other molluscs species like *Mytilus*  
404 *galloprovincialis* (Lombraña et al. 2005), and small abalone *Sulculus diversicolor aquatilis*  
405 (Tsao et al. 2003), and fish like *Pagrus pagrus*, *Pagellus erythrinus*, *Pagellus bogaraveo*,  
406 *Boops boops* and *Diplodus annularis* (Fernández et al. 2001).

407         The analysis on the effect of temperature on amylase activity at pH 7.0, indicated a  
408 maximum activity at 50 °C. These findings agree with previous studies of amylase in  
409 abalone (Nikapitiya et al. 2009; Hsieh et al. 2008; Tsao et al. 2003). Our results also concur  
410 with the amylase activities reported in other molluscs with optimal temperatures between  
411 30 to 60°C (Albentosa and Moyano 2009; Lombraña et al. 2005; Areekijsee et al. 2004;  
412 Tsao et al. 2004; Sabapathy and Teo 1992). The physiological conditions for amylase  
413 activity in loco occur around 18 °C and at this temperature the amylase conserved 50% of

414 its maximum activity. In accordance to our findings, an increase of physiological processes  
415 is commonly seen at high temperatures in marine invertebrates (González et al. 1990). The  
416 amylase from *C. concholepas* showed evidence of a high thermostability within all the  
417 range of analyzed temperatures without inactivation detected, being this results in contrast  
418 to what was found in other molluscs that showed amylase inactivation after heating over  
419 50°C (Tsao et al. 2003,2004). Although the *C. concholepas* amylase showed an optimum  
420 activity of 50°C, it also showed a remarkable stability at lower temperatures including 10-  
421 20°C which are the common temperatures of the waters that the organism inhabits.

422         In the case of pH conditions, our results concur with those previously described in  
423 other molluscs species like abalone ( Nikapitiya et al., 2009; Hsieh et al., 2008), mussels  
424 (Lombraña et al. 2005; Areekijserree et al. 2004; Fernández-Reiriz et al. 2001) and clams  
425 (Albentosa and Moyano 2009). In most studies, amylases have been shown to display a  
426 high sensitivity to low and high pH, which is indicative of the need of neutral pH  
427 conditions for the digestion of carbohydrates, as it was suggested by Sabapathy and Teo  
428 (1992). This also in agreement with the near neutral pH values measured in the digestive  
429 systems of some fishes and molluscs (Munilla-Morán and Saborido-Rey 1996; Sabapathy  
430 and Teo 1992). Comparative studies are difficult to perform due to the carnivorous nature  
431 of loco among molluscs, but in carnivorous fishes amylase activities have been reported  
432 (Fernández et al. 2001; Hidalgo et al. 1999; Munilla-Morán and Saborido-Rey 1996).  
433 Although the role of amylase in carnivorous species still remains unclear due to the lack of  
434 major carbohydrate ingestion (Natalia et al. 2004), the physiological roles of amylases have  
435 been hypothesized in relation to their possible function in glycogen utilization as energy  
436 source (Nikapitiya et al. 2009; Koyama et al. 2001) . The amylase activity in fish depends  
437 on the natural diets of each species, having omnivorous and herbivorous species more

438 amylase activity than carnivores (German et al. 2004; Fernández et al. 2001; Hidalgo et al.  
439 1999; Ugolev et al. 1983; Kapoor et al. 1976), which as expected is associated to higher  
440 carbohydrate consumption and absorption.

441 Besides physical factors like pH and temperature, chemical factors, like metal ions  
442 have been reported to enhance or inhibit amylase activity (Lombraña et al. 2005; Baker  
443 1983; Trainer and Tillinghast 1982). NaCl for instance, is a monovalent ion that increases  
444 amylase activity (Harris et al. 1986), and its effect has been widely described in molluscs  
445 (Nikapitiya et al. 2009; Hsieh et al. 2008; Lombraña et al. 2005; Tsao et al. 2004). Our  
446 results are in accordance with previous literature, showing an increase on its activity when  
447 exposed to 10mM NaCl. Optimum concentrations of NaCl ranging from 0.01 to 1M, have  
448 been described for other marine species (Lombraña et al. 2005; Trainer and Tillinghast  
449 1982; Robson 1979; Wojtowicz and Brockerhoff 1972)

450 The effects of CaCl<sub>2</sub> on amylase activity were consistent and similar to the effects of  
451 Na<sup>2+</sup>. In fact, a group of amylases have been described as metalloproteins that require Ca<sup>2+</sup>  
452 for their activity and stability levels (Fischer 1960) and its removal may produce a decrease  
453 in activity and a lack of thermostability (Violet and Meunier 1989). In addition, Lombraña  
454 et. al (2005) described an optimum amylase activity occurring at CaCl<sub>2</sub> concentrations of  
455 15 and 40 mM in *Mytilus galloprovincialis*. Moreover, in *Haliotis sieboldii* the maximum  
456 activity was registered at 10 mM CaCl<sub>2</sub> (Hsieh et al. 2008). On the other hand, the addition  
457 of Mn<sup>2+</sup> had a negative effect on amylase activity, with a 50% decrease of activity  
458 compared to controls. It is known that Ca<sup>2+</sup> and Mn<sup>2+</sup> ions could stabilize and activate the  
459 enzyme, but can also inhibit it if present at high concentrations (Witt and Sauter 1996).

460 In the presence of Zn<sup>2+</sup>, the activity of amylase was completely inhibited as it  
461 showed a 100% decrease, similar to what have been reported in other species. This

462 inhibition could be due to the direct actions of  $Zn^{2+}$  upon the active center of the enzymes  
463 (Golovanova 2010). In juvenile perch and roaches intestines, the inhibition of digestive  
464 carbohydrases in the presence of  $Zn^{2+}$  decreases the rates of carbohydrates assimilation,  
465 which in turn influences the efficiency of fish feeding in a negative way (Golovanova  
466 2010). EDTA is a chelating agent and a well-known protease inhibitor, specifically for  
467 metalloproteases (Córdova-Murueta et al. 2003), but in this study, it also played a role as an  
468 amylase inhibitor, since the activity of amylase decreased in the presence of the agent,  
469 which removes calcium and other metal ions from solutions.

470

#### 471 ***Protease activity***

472 The digestive gland showed slightly higher specific proteolytic activity ( $7.90 \pm 0.31$   
473  $U/mg \text{ prot}^{-1}$ ) than the gland of Leiblein ( $6.81 \pm 0.37 U/mg \text{ prot}^{-1}$ ) in the crude extract,  
474 however, it was much higher in the last step of the purification procedure showing an  
475 increment of approximately 60% in relation to the 13% of difference between them in the  
476 crude extract. This was expected because this kind of chromatography lowers down the  
477 presence of proteins in the fractions collected in every elution, making the activity more  
478 specific and higher since there is a less amount of proteins. These results could also indicate  
479 that the digestive gland is the main source of proteolytic enzymes as described in marine  
480 gastropods from the genus *Buccinum* where the main source of gastric enzymes is the  
481 digestive gland. The gland of Leiblein facilitates digestion through the intestine and the  
482 stomach, which is responsible of providing the optimal conditions for proteolytic activity at  
483 acidic pH. (Andrews and Thorogood 2005).

484 The digestive tract of *C. concholepas* showed a high acidic proteolytic activity when  
485 exposed to variable pH medium, reporting the maximum proteolytic activity at pH 3.0 in

486 the digestive gland and the gland of Leiblein, which may indicate the presence of aspartic  
487 proteases in both organs. Previous studies have described the presence of these kind of  
488 proteases in molluscs like green abalone and fishes like tilapia at pH 2.0 (García-Carreño et  
489 al. 2003; Yamada et al. 1993) and at pH 3.0 in spiny lobster (Celis-Guerrero et al. 2004).  
490 Proteolytic activity was measured at different temperatures showing higher activity at 50°C  
491 in the digestive gland and the gland of Leiblein, just in the range of temperatures that has  
492 been described in two sparid fishes gilthead seabream (*Sparus aurata*) and common dentex  
493 (*Dentex dentex*) where maximum acidic activity was found between 45-55°C (Alarcón et al.  
494 1998) and in pearl mussel *Hyriopsis bialatus* where was found at 40°C (Areekijsee et al.  
495 2004) under the same pH conditions. This result may suggest that the *C. concholepas*  
496 proteases works at suboptimal temperature conditions, due to the high activity found at  
497 50°C compared to the physiological temperature which is around 18°C. This could be  
498 explained by arguing a better suited structure for activity at high temperatures which  
499 promotes a better enzyme-substrate interaction (Diaz-Tenorio et al. 2006; Whitaker 1994).

500 Further characterization of the crude enzyme was achieved with specific protease  
501 inhibitors. Proteases in the digestive tract of *C. concholepas* seem to belong to two main  
502 proteinase classes; aspartic proteinases and serine proteinases (EC 3.4.21.x). This is  
503 explained, in the case of aspartic enzymes, by the total inhibition of proteolytic activity in  
504 the digestive gland and for the most part in the gland of Leiblein, in presence of Pepstatin  
505 A; a very specific inhibitor, with one of the lowest known  $K_i$  for pepsin (Castillo-Yañez et  
506 al. 2004). The level of inhibition of the acidic proteolytic activity in the gut of *C.*  
507 *concholepas* by Pepstatin A suggests the presence of the aspartic protease pepsin.

508 For the PMSF assay, the activity of proteases was inhibited in a 34 % in the  
509 digestive gland and in a 58 % in the gland of Leiblein of *C. concholepas*, which concur



510 with other similar studies using PMSF on other aquatic species (Dimes et al. 1994; Garcia-  
511 Carreño and Haard 1993). This finding indicated that the slight proteolytic activity in the  
512 gut of this mollusc at pH 7.0 is due to serine proteases, especially in the gland of Leiblein.  
513 In the presence of EDTA, proteases were slightly inhibited which might indicate the  
514 existence of some metalloproteases. The low inhibition effect of this chelator on proteases  
515 may be explained by the fact that the acidic protease pepsin is typically characterized by a  
516 cation-independent mechanism. (Alarcón et al. 1998).

517         The presence of acidic proteolytic activity in the gland of Leiblein concur to what  
518 was described by Ponce et al. (1990), who showed a maximum proteolytic activity at pH  
519 3.5, although we also observed a very slight increase of activity at pH 8. This could be  
520 related to its known function on enzyme secretions (Andrews and Thorogood 2005;  
521 Mansour-Bek 1934), but also to its important support for protein digestion through the mid-  
522 esophagus by the secretion of digestive enzymes and lubricant substances to improve  
523 digestion (Ponce et al. 1990).

524

#### 525 ***Overall evaluation of the amylase and the protease activities.***

526         The detection of high amylase activity in the digestive gland of *C. concholepas* was  
527 unexpected considering its carnivorous feeding habits. Some authors argue that amylase  
528 activity is mediated by the composition of the diet (Reimer 1982), while others suggest that  
529 the production of amylase is family-specific (Chakrabarti et al. 1995), which could be the  
530 case for isolated populations with unique feeding habits. Nevertheless, the presence of  
531 amylase in the digestive gland of loco is an indicative of its capability to degrade  
532 carbohydrates, which could be related to the degradation of structural carbohydrates and the  
533 ability to digest glycogen, an energy source commonly found in animal tissue. It is widely

534 recognized that fishes are capable of changing their feeding habits as a strategy for food  
535 utilization and the presence of isoenzymes in these species might give them an ecological  
536 advantage (Fernández et al. 2001). A similar situation might explain the presence of  
537 amylase in mollusks but to date, changes from carnivorous to herbivorous feeding habits in  
538 molluscs have never been reported. Although, changes in dietary preferences have been  
539 observed in some introduced “loco” populations, where the main diet was replaced from  
540 barnacles (*Balanus laevis* and *Austromegabalanus psittacus*) to ascidians (*Pyura chilensis*)  
541 (Stotz et al. 2003)

542 The absence of amylase activity in the gland of Leiblein was expected since it has  
543 previously been associated to the secretion of proteolytic enzymes in muricid gastropods. It  
544 is important to notice that we mainly found the presence of acidic proteases in the gland of  
545 Leiblein, which is also concurrent with the absence of amylolytic activities. This could  
546 suggest that the food digestion starts in the esophagus and it is carried out on an acidic  
547 medium on its way to the stomach. In fact, current evidence suggests that *C. concholepas*  
548 retains food in the intestine for up to 16 hours, while being retained in the stomach for up to  
549 6 hours (Stotz et al. 2003), which could indicate that the food is being under the effect of  
550 enzyme degradation during prolonged periods of time. Accordingly, these long retention  
551 times could be associated to the sub-optimal temperature conditions in which the enzymes  
552 are working in the organism (~18 C), much lower than the optimal temperature of ~50 C  
553 determined here, therefore, food is being exposed to digestive enzymes for longer periods  
554 to improve digestion. Proteolytic activity at low pH (3.0) was detected in both the digestive  
555 gland and the gland of Leiblein, but showing a higher specific enzymatic activity in the  
556 digestive gland compared to the gland of Leiblein, probably because it is involved in the  
557 final steps of protein degradation. Nevertheless, it must be pointed out that still significant

558 work is made by the proteolytic enzymes secreted by the gland of Leiblein, since these  
559 enzymes execute their function from their secretion in the esophagus until they reach the  
560 stomach, where the protein degradation is complemented by the digestive enzymes located  
561 there.

562

563         The detected levels of protease activity were higher than the levels of amylase  
564 activity in the digestive gland, which could be expected in a carnivorous species and  
565 keeping in mind their digestive requirements. Similar situation has been reported in  
566 numerous carnivorous fish (Xiong et al. 2011; Lundstedt et al. 2004; Natalia et al. 2004;  
567 Sabapathy & Teo 1993). Digestion of carbohydrates is usually overlooked in carnivorous  
568 species, for not being considered as fundamental for its digestive processes. Nevertheless,  
569 amylase activities are present in the digestive system of *C. concholepas* and also in fish of  
570 different feeding habits, showing high to moderate amylase activities (Furné et al., 2005;  
571 Chan et al., 2004; Hidalgo et al., 1999), but higher in herbivorous and omnivorous. The  
572 presence of amylase in the digestive system of *C. concholepas* could certainly be associated  
573 to the need of digesting glycogen, an energy source commonly found in animal tissue.  
574 While most authors suggest that the presence or absence of specific digestive enzymes is  
575 linked to the animal feeding habits, others suggest that could be associated to phylogeny  
576 (Chan et al. 2004). Studies involving digestive enzymes in molluscs and particularly  
577 carnivorous molluscs is extremely scarce, therefore, more work is needed to identify the  
578 range of enzymes present in the digestive system of these species.

579

580 **CONCLUSION**

581 Digestive enzymes in marine organisms have been widely studied over the years. In  
582 this study, the amylase and protease activities present in *C. concholepas* were analyzed.  
583 The major goal of this research was to understand and provide relevant information about  
584 the nutritive physiology of this interesting mollusc, but also to assess its abilities to digest  
585 alternative food sources besides its normal carnivorous diet. In view of the potential interest  
586 of cultivation and establishment of field rearing of *C. concholepas*, the shown capabilities  
587 of amylase and protease enzymes in a carnivorous muricid gastropod may be an interesting  
588 feature from the perspective of feed formulation.

589

#### 590 **ACKNOWLEDGEMENTS**

591 We would like to thank our professor Dr. Elena A. Uribe for her incredible support and  
592 understanding during our early years. Also we thank Dr. Victor H. Ruiz (Department of  
593 Zoology, Universidad de Concepción) for his helpful review and comments on the  
594 manuscript. No funded projects were involved in this study. All the analyses were carried  
595 out from March to September 2010.

596

597

598

599

600

601

602

603

604

605   **REFERENCES**

606

- 607   ALARCÓN, F.J., DÍAZ, M., MOYANO, F.J. & ABELLÁN, E. 1998. Characterization and  
608       functional properties of digestive proteases in two sparids; gilthead seabream  
609       (*Sparus aurata*) and common dentex (*Dentex dentex*). Fish Physiology and  
610       Biochemistry. 19, 257-267.
- 611   ALBENTOSA, M. & MOYANO, F. 2009. Differences in the digestive biochemistry between  
612       the intertidal clam, *Ruditapes decussatus*, and the subtidal clam, *Venerupis*  
613       

614   ANDREWS, E.B. & THOROGOOD, K.E. 2005. An ultrastructural study of the gland of leiblein  
615       of muricid and nassarid neogastropods in relation to function, with a discussion on  
616       its homologies in other caenogastropods. J. Mollus. Stud. 71, 269-300.

617   AREEKIJSEREE, M., ENKAGUL, A., KOVITVADHI, U., THONGPAN, A., MINGMUANG, M.,  
618       PAKKONG, P. & RUNGRUANGSAK-TORRISSEN, K. 2004. Temperature and pH  
619       characteristics of amylase and proteinase of adult freshwater pearl mussel,  
620       *Hyriopsis (Hyriopsis) bialatus* Simpson 1900. Aquaculture. 234, 575-587.

621   BAKER, J.E. 1983. Properties of amylases from midguts of larvae of *Sitophilus zeamais* and  
622       *Sitophilus granarius*. Insect Biochemistry. 13, 421-428.

623   BERNFELD, P. 1955. Amylases,  $\alpha$  and  $\beta$ . Methods in enzymology. 1, 149-152.

624   BRADFORD, M.M. 1976. A rapid and sensitive method for the quantitation of microgram  
625       quantities of protein utilizing the principle of protein-dye binding. Analytical  
626       Biochemistry. 72, 248-254.

627   CASTILLA, J.C. & DEFEO, O. 2001. Latin American benthic shellfisheries: emphasis on co-  
628       management and experimental practices. Rev. Fish. Biol. Fish. 11, 1-30.

629   CASTILLO-YAÑEZ, F.J., PACHECO-AGUILAR, R., GARCIA-CARREÑO, F.L. & NAVARRETE DEL  
630       TORO, M.A. 2004. Characterization of acidic proteolytic enzymes from Monterey  
631       sardine (*Sardinops sagax caerulea*) viscera. Food Chemistry. 85, 343-350.

632   CELIS-GUERRERO, L., GARCÍA-CARREÑO, F. & NAVARRETE DEL TORO, M.A. 2004.  
633       Characterization of proteases in the digestive system of spiny lobster (*Panulirus*  
634       interruptus). Marine Biotechnology. 6, 262-269.

635   CÓRDOVA-MURUETA, J., GARC A-CARREÑO, F. & NAVARRETE DEL TORO, M.A. 2003.  
636       Digestive enzymes present in crustacean feces as a tool for biochemical,  
637       physiological, and ecological studies. Journal of Experimental Marine Biology and  
638       Ecology. 297, 43-56.

- 639 CHAN, A.S. HORN, M.H. DICKSON, K.A. GAWLICKA, A. 2004. Digestive enzyme activities  
640 in carnivores and herbivores: comparisons among four closely related prickleback  
641 fishes (Teleostei: Stichaeidae) from a California rocky intertidal habitat. *J. Fish*  
642 *Biol.* 65, 848-858.
- 643 CHAKRABARTI, I., GANI, M.A., CHAKI, K.K., SUR, R. & MISRA, K.K. 1995. Digestive  
644 enzymes in 11 freshwater teleost fish species in relation to food habit and niche  
645 segregation. *Comparative Biochemistry and Physiology Part A: Physiology.* 112,  
646 167-177.
- 647 CHONG, A., HASHIM, R. & BIN ALI, A. 2002a. Inhibition of protease activities in discus  
648 *Symphysodon* spp. by three plant meals. *Aquaculture International.* 10, 433-441.
- 649 CHONG, A.S.C., HASHIM, R., CHOW-YANG, L. & ALI, A.B. 2002b. Partial characterization  
650 and activities of proteases from the digestive tract of discus fish (*Symphysodon*  
651 *aequifasciata*). *Aquaculture.* 203, 321-333.
- 652 DIAZ-TENORIO, L.M., GARCIA-CARRENO, F.L. & NAVARRETE DEL TORO, M.A. 2006.  
653 Characterization and comparison of digestive proteinases of the Cortez swimming  
654 crab, *Callinectes bellicosus*, and the arched swimming crab, *Callinectes arcuatus*.  
655 *Invertebrate Biology.* 125, 125-135.
- 656 DIMES, L.E., GARCIA-CARREÑO, F.L. & HAARD, N.F. 1994. Estimation of protein  
657 digestibility--III. Studies on the digestive enzymes from the pyloric ceca of rainbow  
658 trout and salmon. *Comparative Biochemistry and Physiology Part A: Physiology.*  
659 109, 349-360.
- 660 DYE, A.H. 1991. Feed preferences of *Nucella crassilabrum* and juvenile *Concholepas*  
661 *concholepas* (Gastropoda:Muricidae) from a rocky shore in southern Chile. *J.*  
662 *Mollus. Stud.* 57, 301-307.
- 663 EDWARDS, S. & CONDON, C. 2001. Digestive protease characterization, localization and  
664 adaptation in blacklip abalone (*Haliotis rubra* Leach). *Aquac. Res.* 32, 95-102.
- 665 FERNÁNDEZ-REIRIZ, M.J., LABARTA, U., NAVARRO, J.M. & VELASCO, A. 2001. Enzymatic  
666 digestive activity in *Mytilus chilensis* (Hupé 1854) in response to food regimes and  
667 past feeding history. *Journal of Comparative Physiology B: Biochemical, Systemic,*  
668 *and Environmental Physiology.* 171, 449-456.
- 669 FERNÁNDEZ GIMENEZ, A.V., GARCÍA-CARREÑO, F.L., NAVARRETE DEL TORO, M.A. &  
670 FENUCCI, J.L. 2002. Digestive proteinases of *Artemesia longinaris* (Decapoda,  
671 Penaeidae) and relationship with molting. *Comparative Biochemistry and*  
672 *Physiology Part B: Biochemistry and Molecular Biology.* 132, 593-598.
- 673 FERNÁNDEZ, I., MOYANO, F.J., DÍAZ, M. & MARTÍNEZ, T. 2001. Characterization of [alpha]-  
674 amylase activity in five species of Mediterranean sparid fishes (Sparidae, Teleostei).  
675 *Journal of Experimental Marine Biology and Ecology.* 262, 1-12.

- 676 FISCHER, E.H. & STEIN, E.A. 1960.  $\alpha$ -amylases., The Enzymes. Academic Press, New York,  
677 pp. pp. 126– 145.
- 678 FU, X., XUE, C., MIAO, B., LI, Z., GAO, X. & YANG, W. 2005. Characterization of proteases  
679 from the digestive tract of sea cucumber (*Stichopus japonicus*): High alkaline  
680 protease activity. Aquaculture. 246, 321-329.
- 681 FURNÉ, M. HIDALGO, M.C. LÓPEZ, A. GARCÍA-GALLEGO, M. MORALES, A.E. DOMEZAIN, A.  
682 DOMEZAINÉ, J., SANZ, A. 2005. Digestive enzyme activities in Adriatic sturgeon  
683 *Acipenser naccarii* and rainbow trout *Oncorhynchus mykiss*. A comparative study.  
684 Aquaculture 250, 391-398.
- 685 GARCÍA -CARREÑO, F.L. & HAARD, F. 1993. Characterization of proteinase classes in  
686 langostilla (*Pleuroncodes planipes*) and crayfish (*Pacifastacus astacus*) extracts. J.  
687 Food Biochem. 17, 97-113.
- 688 GARCÍA-CARREÑO, F.L., NAVARRETE DEL TORO, M.A. & SERVIERE-ZARAGOZA, E. 2003.  
689 Digestive enzymes in juvenile green abalone, *Haliotis fulgens*, fed natural food.  
690 Comparative Biochemistry and Physiology Part B: Biochemistry and Molecular  
691 Biology. 134, 143-150.
- 692 GARCIA-ESQUIVEL, Z. & FELBECK, H. 2006. Activity of digestive enzymes along the gut of  
693 juvenile red abalone, *Haliotis rufescens*, fed natural and balanced diets.  
694 Aquaculture. 261, 615-625.
- 695 GERMAN, D.P., HORN, M.H. & GAWLICKA, A. 2004. Digestive Enzyme Activities in  
696 Herbivorous and Carnivorous Prickleback Fishes (Teleostei: Stichaeidae):  
697 Ontogenetic, Dietary, and Phylogenetic Effects. Physiological and Biochemical  
698 Zoology. 77, 789-804.
- 699 GERMAN, D.P., NAGLE, B.C., VILLEDA, J.M., RUIZ, A.M., THOMSON, A.W. CONTRERAS  
700 BALDERAS, S. & EVANS, D.H. 2010. Evolution of Herbivory in a Carnivorous Clade  
701 of Minnows (Teleostei: Cyprinidae): Effects on Gut Size and Digestive Physiology.  
702 Physiological and Biochemical Zoology. 83, 1-18.
- 703 GIMENEZ, A.V.F., GARCIA-CARRENO, F.L., NAVARRETE DEL TORO, M.A. & FENUCCI, J.L.  
704 2002. Digestive proteinases of *Artemesia longinaris* (Decapoda, Penaeidae) and  
705 relationship with molting. Comparative Biochemistry and Physiology B-  
706 Biochemistry & Molecular Biology. 132, 593-598.
- 707 GLASS, H.J., MACDONALD, N.L., MORAN, R.M. & STARK, J.R. 1989. Digestion of protein in  
708 different marine species. Comparative Biochemistry and Physiology Part B:  
709 Comparative Biochemistry. 94, 607-611.
- 710 GOLOVANOVA, I. 2010. Influence of biogenic metals (Cu, Zn) on the activity of  
711 carbohydrases in juvenile fish in vitro. Inland Water Biology. 3, 90-95.

- 712 GONZÁLEZ, M.L., PÉREZ, M.C., LÓPEZ, D.A. & BUITANO, M.S. 1990. Efecto de la  
713 temperatura en la disponibilidad de energía para crecimiento de *Concholepas*  
714 *concholepas* (Bruguière). *Rev. Biol. Mar.* 25, 71-81.
- 715 HARRIS, R.P., SAMAIN, J.F., MOAL, J., MARTIN-JÉZÉQUEL, V. & POULET, S.A. 1986. Effects  
716 of algal diet on digestive enzyme activity in *Calanus helgolandicus*. *Marine*  
717 *Biology.* 90, 353-361.
- 718 HERNÁNDEZ-SANTOYO, A., HERNÁNDEZ-ARANA, A., ARREGUÍN-ESPINOSA, R. &  
719 RODRÍGUEZ-ROMERO, A. 1998. Purification and characterization of several digestive  
720 proteases from the blue abalone, *Haliotis fulgens*. *Aquaculture.* 159, 203-216.
- 721 HIDALGO, M.C., UREA, E. & SANZ, A. 1999. Comparative study of digestive enzymes in  
722 fish with different nutritional habits. Proteolytic and amylase activities.  
723 *Aquaculture.* 170, 267-283.
- 724 HSIEH, M.-S., YIN, L.-J. & JIANG, S.-T. 2008. Purification and characterization of the  
725 amylase from a small abalone *Haliotis sieboldii*. *Fish. Sci.* 74, 425-432.
- 726 HUAQUÍN, L. 1966. Anatomía de *Concholepas concholepas* (Gastropoda, Muricidae).  
727 Universidad Católica de Chile, pp. 53.
- 728 KAPOOR, B.G., SMIT, H. & VERIGHINA, I.A. 1976. The Alimentary Canal and Digestion in  
729 Teleosts. in: Frederick, S.R., Maurice, Y. (Eds.), *Advances in Marine Biology.*  
730 Academic Press, pp. 109-239.
- 731 KNAUER, J., BRITZ, P.J. & HECHT, T. 1996. Comparative growth performance and digestive  
732 enzyme activity of juvenile South African abalone, *Haliotis midae*, fed on diatoms  
733 and a practical diet. *Aquaculture.* 140, 75-85.
- 734 KOYAMA, I., KOMINE, S.-I., HOKARI, S., YAKUSHIJIN, M., MATSUNAGA, T. & KOMODA, T.  
735 2001. Expression of alpha-amylase gene in rat liver: Liver-specific amylase has a  
736 high affinity to glycogen. *Electrophoresis.* 22, 12-17.
- 737 KUMAR, S., GARCIA-CARREÑO, F.L., CHAKRABARTI, R., NAVARRETE DEL TORO, M.A. &  
738 CORDOVA-MURUETA, J.H. 2007. Digestive proteases of three carps *Catla catla*,  
739 *Labeo rohita* and *Hypophthalmichthys molitrix*: partial characterization and protein  
740 hydrolysis efficiency. *Aquaculture Nutrition.* 13, 381-388.
- 741 LAEMMLI, U.K. 1970. Cleavage of Structural Proteins during the Assembly of the Head of  
742 Bacteriophage T4. *Nature.* 227, 680-685.
- 743 LEIVA, G.E. & CASTILLA, J.C. 2001. A review of the world marine gastropod fishery:  
744 evolution of catches, management and the Chilean experience. *Rev. Fish. Biol. Fish.*  
745 11, 283-300.
- 746 LOMBRAÑA, M., SUÁREZ, P. & SAN JUAN, F. 2005. Two forms of a-amylase in mantle tissue  
747 of *Mytilus galloprovincialis*: Purification and molecular properties of form II.



- 748 Comparative Biochemistry and Physiology Part B: Biochemistry and Molecular  
749 Biology. 142, 56-66.
- 750 LUNA-GONZALEZ, A., MAEDA-MARTINEZ, A.N., ASCENCIO-VALLE, F. & ROBLES-  
751 MUNGARAY, M. 2004. Ontogenetic variations of hydrolytic enzymes in the Pacific  
752 oyster *Crassostrea gigas*. Fish & Shellfish Immunology. 16, 287-294.
- 753 LUNDSTEDT, L.M. FERNANDO BIBIANO MELO, J. MORAES, G. 2004. Digestive enzymes and  
754 metabolic profile of *Pseudoplatystoma corruscans* (Teleostei: Siluriformes) in  
755 response to diet composition. Comparative Biochemistry and Physiology Part B:  
756 Biochemistry and Molecular Biology 137, 331-339.
- 757 MALDONADO, R. 1965. Estudio macroscópico, microscópico e histoquímico de  
758 *Concholepas concholepas*. Primera comunicación: anatomía macroscópica. Rev.  
759 Biol. Mar. 12, 121-128.
- 760 MANRÍQUEZ, P.H., DELGADO, A.P., JARA, M.E. & CASTILLA, J.C. 2008. Field and laboratory  
761 pilot rearing experiments with early ontogenic stages of *Concholepas concholepas*  
762 (Gastropoda: Muricidae). Aquaculture. 279, 99-107.
- 763 MANSOUR-BEK, J.J. 1934. Über die proteolytischen Enzyme von *Murex anguliferus* Lamk.  
764 Journal of Comparative Physiology A: Neuroethology, Sensory, Neural, and  
765 Behavioral Physiology. 20, 343-369.
- 766 MATUS DE LA PARRA, A., ROSAS, A., LAZO, J.P. & VIANA, M.T. 2007. Partial  
767 characterization of the digestive enzymes of Pacific bluefin tuna *Thunnus orientalis*  
768 under culture conditions. Fish Physiology and Biochemistry. 33, 223-231.
- 769 MÉNDEZ, M. & CANCINO, J. 1990. Preferencias alimentarias de ejemplares  
770 postmetamórficos y juveniles de *Concholepas concholepas* (Bruguière, 1789). Rev.  
771 Biol. Mar. 25, 109-120.
- 772 MUNILLA-MORÁN, R. & SABORIDO-REY, F. 1996. Digestive enzymes in marine species. II.  
773 Amylase activities in gut from seabream (*Sparus aurata*), turbot (*Scophthalmus*  
774 *maximus*) and redfish (*Sebastes mentella*). Comparative Biochemistry and  
775 Physiology Part B: Biochemistry and Molecular Biology. 113, 827-834.
- 776 NATALIA, Y., HASHIM, R., ALI, A. & CHONG, A. 2004. Characterization of digestive  
777 enzymes in a carnivorous ornamental fish, the Asian bony tongue *Scleropages*  
778 *formosus* (Osteoglossidae). Aquaculture. 233, 305-320.
- 779 NIKAPITIYA, C., OH, C., WHANG, I., KIM, C.-G., LEE, Y.-H., KIM, S.-J. & LEE, J. 2009.  
780 Molecular characterization, gene expression analysis and biochemical properties of  
781 a-amylase from the disk abalone, *Haliotis discus discus*. Comparative Biochemistry  
782 and Physiology Part B: Biochemistry and Molecular Biology. 152, 271-281.

- 783 OMONDI, J. & STARK, J. 2001. Studies on digestive proteases from midgut glands of a  
784 shrimp, *Penaeus indicus*, and a lobster, *Nephrops norvegicus*. Applied  
785 Biochemistry and Biotechnology. 90, 137-153.
- 786 PAVASOVIC, M., RICHARDSON, N.A., ANDERSON, A.J., MANN, D. & MATHER, P.B. 2004.  
787 Effect of pH, temperature and diet on digestive enzyme profiles in the mud crab,  
788 *Scylla serrata*. Aquaculture. 242, 641-654.
- 789 PICOS-GARCIA, C., GARCIA-CARRENO, F.L. & SERVIERE-ZARAGOZA, E. 2000. Digestive  
790 proteases in juvenile Mexican green abalone, *Haliotis fulgens*. Aquaculture. 181,  
791 157-170.
- 792 PONCE, P., MAGAÑA, A., SANCHEZ, L. & ENRIQUEZ, S. 1990. Estudio funcional de la  
793 glandula de Leiblein de *Concholepas concholepas* (Brugiere,1789) (Gastropoda,  
794 muricidae). Boletín de la Sociedad de Biología de Concepción, Chile, 127-134.
- 795 REIMER, G. 1982. The influence of diet on the digestive enzymes of the Amazon fish  
796 Matríncha, *Brycon cf. melanopterus*. Journal of Fish Biology. 21, 637-642.
- 797 ROBSON, C.M. 1979. Purification and properties of the digestive amylase of *Asellus*  
798 *aquaticus* (L.) (crustacea, isopoda). Comparative Biochemistry and Physiology Part  
799 B: Biochemistry and Molecular Biology. 62, 501-505.
- 800 SABAPATHY, U. & TEO, L.H. 1992. A kinetic study of the [alpha]-amylase from the  
801 digestive gland of *Perna viridis* L. Comparative Biochemistry and Physiology Part  
802 B: Biochemistry and Molecular Biology. 101, 73-77.
- 803 SABAPATHY, U. & TEO, L.H. 1993. A quantitative study of some digestive enzymes in the  
804 rabbitfish, *Siganus canaliculatus* and the sea bass, *Lates calcarifer*. Journal of Fish  
805 Biology. 42, 595-602.
- 806 SAINZ, J.C., GARCIA-CARRENO, F., SIERRA-BELTRAN, A. & HERNANDEZ-CORTES, P. 2004.  
807 Trypsin synthesis and storage as zymogen in the midgut gland of the shrimp  
808 *Litopenaeus vannamei*. J. Crustac. Biol. 24, 266-273.
- 809 SERNAPESCA. 2014. Anuario Estadístico de Pesca. Gobierno de Chile.
- 810 STOTZ, W. B., GONZALEZ, S. A., CAILLAUX, L., & ABURTO, J. 2003. Quantitative evaluation  
811 of the diet and feeding behavior of the carnivorous gastropod, *Concholepas*  
812 *concholepas* (Brugiere, 1789)(Muricidae) in subtidal habitats in the southeastern  
813 Pacific upwelling system. Journal of Shellfish Research, 22(1), 147-164.
- 814 TRAINER, D.G. & TILLINGHAST, E.K. 1982. Amylolytic activity of the crystalline style of  
815 *mya arenaria* (bivalvia, mollusca). Comparative Biochemistry and Physiology Part  
816 A: Physiology. 72, 99-103.

- 817 TSAO, C.-Y., PAN, Y.-Z. & JIANG, S.-T. 2003. Purification and Characterization of  
818 Amylases from Small Abalone (*Sulculus diversicolor aquatilis*). Journal of  
819 Agricultural and Food Chemistry. 51, 1064-1070.
- 820 TSAO, C.-Y., HSU, Y.-H., CHAO, L.-M. & JIANG, S.-T. 2004. Purification and  
821 characterization of three amylases from viscera of hard clam *Meretrix lusoria*. Fish.  
822 Sci. 70, 174-182.
- 823 UGOLEV, A.M., EGOROVA, V.V., KUZ'MINA, V.V. & GRUSDKOV, A.A. 1983. Comparative-  
824 molecular characterization of membrane digestion in fish and mammals.  
825 Comparative Biochemistry and Physiology Part B: Comparative Biochemistry. 76,  
826 627-635.
- 827 VIANA, M.T., CORREA, G., LAZO, J.P., FRIAS-DIAZ, R., DURAZO-BELTRAN, E. & VASQUEZ-  
828 PELAEZ, C. 2007. Digestive physiology and metabolism of green abalone *Haliotis*  
829 *fulgens* from postlarvae to juvenile, fed three different diatoms. Aquaculture. 271,  
830 449-460.
- 831 VIOLET, M. & MEUNIER, J. 1989. Kinetic study of the irreversible thermal denaturation of  
832 *Bacillus licheniformis*  $\alpha$ -amylase. Biochem. J. 263, 665-670.
- 833 WHITAKER, J.R. 1994. Principles of enzymology for the food sciences, 2nd ed. Marcel  
834 Dekker, New York.
- 835 WITT, W. & SAUTER, J.J. 1996. Purification and properties of a starch granule-degrading  $\alpha$ -  
836 amylase from potato tubers. J. Exp. Bot. 47, 1789-1795.
- 837 WOJTOWICZ, M.B. & BROCKERHOFF, H. 1972. Isolation and some properties of the  
838 digestive amylase of the american lobster (*Homarus Americanus*). Comparative  
839 Biochemistry and Physiology Part B: Biochemistry and Molecular Biology. 42,  
840 295-302.
- 841 XIONG, D.M. XIE, C.X. ZHANG, H.J. LIU, H.P. 2011. Digestive enzymes along digestive  
842 tract of a carnivorous fish *Glyptosternum maculatum* (Sisoridae, Siluriformes). J.  
843 Anim. Physiol. Anim. Nutr. 95, 56-64.
- 844 YAMADA, A., TAKANO, K. & KAMOI, I. 1993. Purification and properties of protease from  
845 tilapia stomach. Nippon Suisan Gakkaishi. 59, 1903-1908.
- 846 ZAMBONINO INFANTE, J.L. & CAHU, C.L. 2007. Dietary modulation of some digestive  
847 enzymes and Metabolic processes in developing marine fish: Applications to diet  
848 formulation. Aquaculture. 268, 98-105.  
849  
850  
851  
852  
853  
854
